# Supplementary material
Source: ML conference proceedings conference paper supplement (https://proceedings.neurips.cc/paper_files/paper/2020/hash/b44182379bf9fae976e6ae5996e13cd8-Abstract.html)
Supplement: Supplementary file [file b44182379bf9fae976e6ae5996e13cd8-Supplemental.zip]

# DRAMSim2

Elliott Cooper-Balis

Paul Rosenfeld

Bruce Jacob

University of Maryland

dramninjas [at] gmail [dot] com

---

## Contents

|          |                                  |          |
|----------|----------------------------------|----------|
| <b>1</b> | <b>About DRAMSim2</b>            | <b>1</b> |
| <b>2</b> | <b>Getting DRAMSim2</b>          | <b>2</b> |
| <b>3</b> | <b>Building DRAMSim2</b>         | <b>2</b> |
| <b>4</b> | <b>Running DRAMSim2</b>          | <b>3</b> |
| 4.1      | Trace-Based Simulation . . . . . | 3        |
| 4.2      | Library Interface . . . . .      | 3        |
| <b>5</b> | <b>Example Output</b>            | <b>5</b> |
| <b>6</b> | <b>Results Output</b>            | <b>6</b> |

---

## 1 About DRAMSim2

DRAMSim2 is a cycle accurate model of a DRAM memory controller, the DRAM modules which comprise system storage, and the buses by which they communicate.

The overarching goal is to have a simulator that is small, portable, and accurate. The simulator core has a simple interface which allows it to be CPU simulator agnostic and should to work with any simulator (see section 4.2). This core has no external run time or build time dependencies and has been tested with g++ on Linux as well as g++ on Cygwin on Windows.

## 2 Getting DRAMSim2

DRAMSim2 is available on github. If you have git installed you can clone our repository by typing:

```
$ git clone git://github.com/dramninjaSMD/DRAMSim2.git
```

## 3 Building DRAMSim2

To build an optimized standalone trace-based simulator called `DRAMSim` simply type:

```
$ make
```

For a debug build which contains debugging symbols and verbose output, run:

```
$ make DEBUG=1
```

To build the DRAMSim2 library, type:

```
$ make libdramsim.so
```

## 4 Running DRAMSim2

### 4.1 Trace-Based Simulation

In standalone mode, DRAMSim2 can simulate memory system traces. While traces are not as accurate as a real CPU model driving the memory model, they are convenient since they can be generated in a number of different ways (instrumentation, hardware traces, CPU simulation, etc.) and reused.

We've provided a few small sample traces in the `traces/` directory. These gzipped traces should first be pre-processed before running through the simulator. To run the preprocessor (the preprocessor requires python):

```
cd traces/  
./traceParse.py k6_aoe_02_short.trc.gz
```

This should produce the file `traces/k6_aoe_02_short.trc`. Then, go back to the DRAMSim2 directory and run the trace based simulator:

```
cd .  
./DRAMSim -t traces/k6_aoe_02_short.trc -s system.ini -d ini/DDR3_micron_64M_8B_x4_sg15.ini -c 1000
```

This will run a 1000 cycle simulation of the `k6_aoe_02_short` trace using the specified DDR3 part. The `-s`, `-d`, and `-t` flags are required to run a simulation.

A full list of the command line arguments can be obtained by typing:

```
$ ./DRAMSim --help  
DRAMSim2 Usage:  
DRAMSim -t tracefile -s system.ini -d ini/device.ini [-c #] [-p pwd] -q  
-t, --tracefile=FILENAME  specify a tracefile to run  
-s, --systemini=FILENAME  specify an ini file that describes the memory system parameters  
-d, --deviceini=FILENAME  specify an ini file that describes the device-level parameters  
-c, --numcycles=#         specify number of cycles to run the simulation for [default=30]  
-q, --quiet               flag to suppress simulation output (except final stats) [default=no]  
-o, --option=OPTION_A=234 overwrite any ini file option from the command line  
-p, --pwd=DIRECTORY       Set the working directory
```

Some traces include timing information, which can be used by the simulator or ignored. The benefit of ignoring timing information is that requests will stream as fast as possible into the memory system and can serve as a good stress test. To toggle the use of clock cycles, please change the `useClockCycle` flag in `TraceBasedSim.cpp`. If you have a custom trace format you'd like to use, you can modify the `parseTraceFileLine()` function to add support for your own trace formats.

The prefix of the filename determines which type of trace this function will use (ex: `k6_foo.trc`) will use the `k6` format in `parseTraceFileLine()`.

### 4.2 Library Interface

In addition to simulating memory traces, DRAMSim2 can also be built as a dynamic shared library which is convenient for connecting it to CPU simulators or other custom front ends. A `MemorySystem` object encapsulates the functionality of the memory system (i.e., the memory controller and DIMMs). The classes that comprise DRAMSim2 can be seen in figure 1. A simple example application is provided in the `example_app/` directory. At this time we have plans to provide code to integrate DRAMSim2 into MARSSx86, SST, and (eventually) M5.

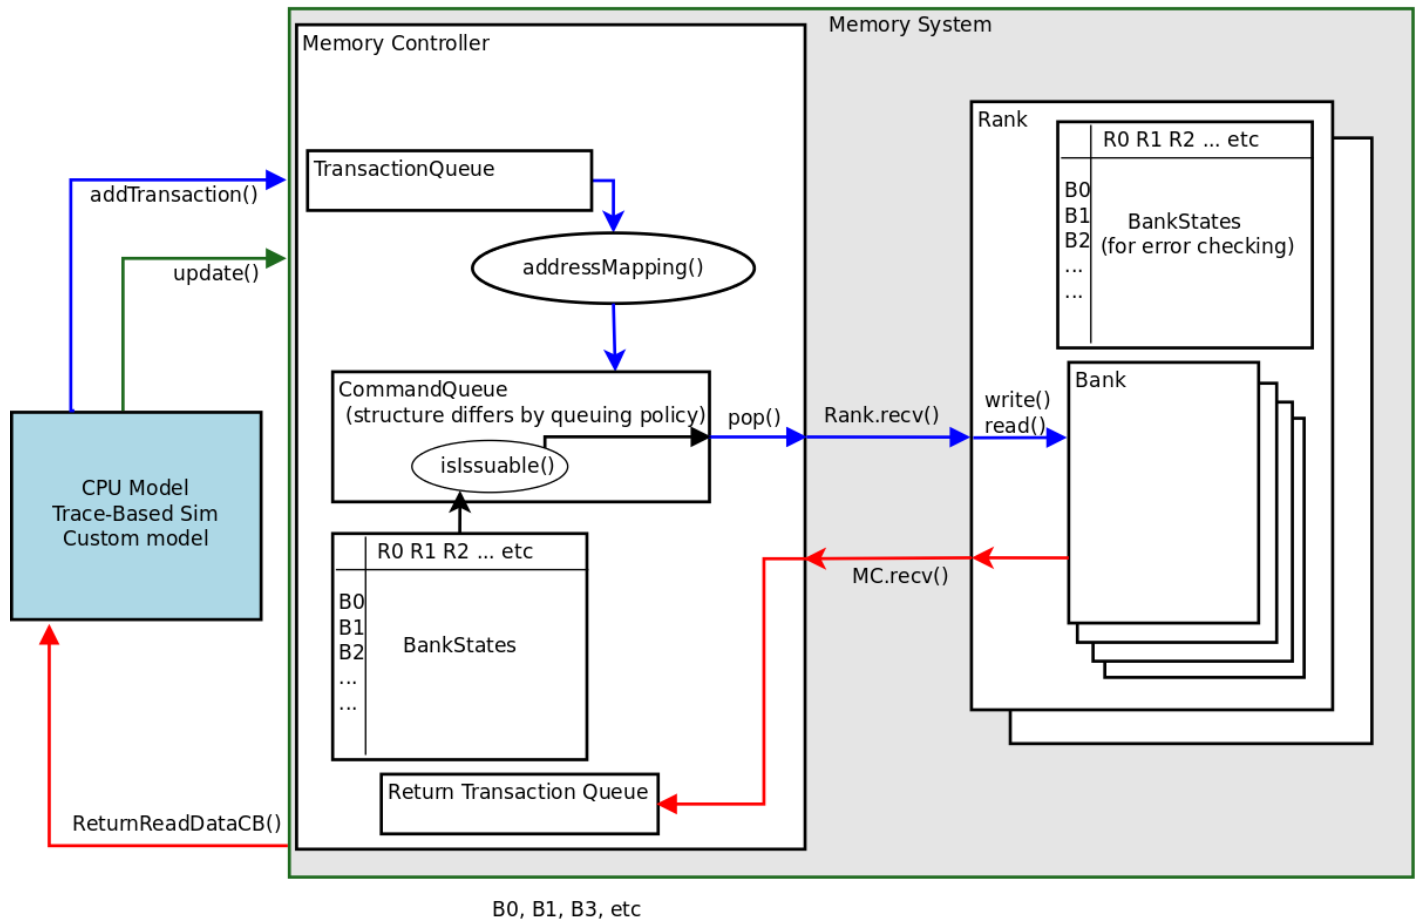

Figure 1: Block diagram of DRAMSim2. The `recv()` functions are actually called `receiveFromBus()` but were abbreviated to save space.

## 5 Example Output

The verbosity of the DRAMSim2 can be customized in the system.ini file by turning the various debug flags on or off.

Below, we have provided a detailed explanation of the simulator output. With all DEBUG flags enabled, the following output is displayed for each cycle executed.

**NOTE** : BP = Bus Packet, T = Transaction

MC = MemoryController, R# = Rank (index #)

```
----- Memory System Update -----
----- Memory Controller Update Starting ----- [8]
-- R0 Receiving On Bus      : BP [ACT] pa[0x5dec7f0] r[0] b[3] row[1502] col[799]
-- MC Issuing On Data Bus   : BP [DATA] pa[0x7edc7e0] r[0] b[2] row[2029] col[799] data[0]=
++ Adding Read energy to total energy
-- MC Issuing On Command Bus : BP [READ_P] pa[0x5dec7f8] r[1] b[3] row[1502] col[799]
== New Transaction - Mapping Address [0x5dec800] (read)
Rank : 0
Bank : 0
Row  : 1502
Col   : 800
++ Adding IDD3N to total energy [from rank 0]
++ Adding IDD3N to total energy [from rank 1]
== Printing transaction queue
8]T [Read] [0x45bbfa4]
9]T [Write] [0x55fbfa0] [5439E]
10]T [Write] [0x55fbfa8] [1111]
== Printing bank states (According to MC)
[idle] [idle] [2029] [1502]
[idle] [idle] [1502] [1502]

== Printing Per Rank, Per Bank Queue
= Rank 0
Bank 0 size : 2
0]BP [ACT] pa[0x5dec800] r[0] b[0] row[1502] col[800]
1]BP [READ_P] pa[0x5dec800] r[0] b[0] row[1502] col[800]
Bank 1 size : 2
0]BP [ACT] pa[0x5dec810] r[0] b[1] row[1502] col[800]
1]BP [READ_P] pa[0x5dec810] r[0] b[1] row[1502] col[800]
Bank 2 size : 2
0]BP [ACT] pa[0x5dec7e0] r[0] b[2] row[1502] col[799]
1]BP [READ_P] pa[0x5dec7e0] r[0] b[2] row[1502] col[799]
Bank 3 size : 1
0]BP [READ_P] pa[0x5dec7f0] r[0] b[3] row[1502] col[799]
= Rank 1
Bank 0 size : 2
0]BP [ACT] pa[0x5dec808] r[1] b[0] row[1502] col[800]
1]BP [READ_P] pa[0x5dec808] r[1] b[0] row[1502] col[800]
Bank 1 size : 2
0]BP [ACT] pa[0x5dec818] r[1] b[1] row[1502] col[800]
1]BP [READ_P] pa[0x5dec818] r[1] b[1] row[1502] col[800]
Bank 2 size : 1
0]BP [READ_P] pa[0x5dec7e8] r[1] b[2] row[1502] col[799]
Bank 3 size : 0
```

Anything sent on the bus is encapsulated in an BusPacket (BP) object. When printing, they display the following information:

```
BP [ACT] pa[0x5dec818] r[1] b[1] row[1502] col[800]
```

The information displayed is (in order): command type, physical address, rank #, bank #, row #, and column #.

Lines beginning with ” – ” indicate bus traffic, ie,

```
-- R0 Receiving On Bus      : BP [ACT] pa[0x5dec7f0] r[0] b[3] row[1502] col[799]
-- MC Issuing On Data Bus   : BP [DATA] pa[0x7edc7e0] r[0] b[2] row[2029] col[799] data[0]=
-- MC Issuing On Command Bus : BP [READ_P] pa[0x5dec7f8] r[1] b[3] row[1502] col[799]
```

Sender and receiver are indicated and the packet being sent is detailed.

Lines beginning with ” ++ ” indicate power calculations, ie,

```
++ Adding Read energy to total energy
++ Adding IDD3N to total energy [from rank 0]
++ Adding IDD3N to total energy [from rank 1]
```

The state of the system and the actions taken determine which current draw is used. For further detail about each current value, see Micron datasheet.

If a pending transaction is in the transaction queue, it will be printed, as seen below:

```
== Printing transaction queue
1]T [Read] [0x45bbfa4]
2]T [Write] [0x55fbfa0] [5439E]
3]T [Write] [0x55fbfa8] [1111]
```

Currently, at the start of every cycle, the head of the transaction queue is removed, broken up into DRAM commands and placed in the appropriate command queues. To do this, an address mapping scheme is applied to the transaction’s physical address, the output of which is seen below:

```
== New Transaction - Mapping Address [0x5dec800] (read)
Rank : 0
Bank : 0
Row : 1502
Col : 800
```

If there are pending commands in the command queue, they will be printed. The output is dependent on the designated structure for the command queue. For example, per-rank/per-bank queues are shown below:

```
= Rank 1
Bank 0 size : 2
0]BP [ACT] pa[0x5dec808] r[1] b[0] row[1502] col[800]
1]BP [READ_P] pa[0x5dec808] r[1] b[0] row[1502] col[800]
Bank 1 size : 2
0]BP [ACT] pa[0x5dec818] r[1] b[1] row[1502] col[800]
1]BP [READ_P] pa[0x5dec818] r[1] b[1] row[1502] col[800]
Bank 2 size : 1
0]BP [READ_P] pa[0x5dec7e8] r[1] b[2] row[1502] col[799]
Bank 3 size : 0
```

The state of each bank in the system is also displayed:

```
== Printing bank states (According to MC)
[idle] [idle] [2029] [1502]
[idle] [idle] [1502] [1502]
```

Banks can be in many states, including idle, row active (shown with the row that is active), refreshing, or precharging. These states will update based on the commands being sent by the controller.

## 6 Results Output

In addition to printing memory statistics and debug information to standard out, DRAMSim2 also produces a ‘vis’ file in the `results/` directory. A vis file is essentially a summary of relevant statistics that is generated per

epoch (the number of cycles per epoch can be set by changing the EPOCH\_COUNT parameter in the `system.ini` file).

We are currently working on DRAMVis, which is a cross-platform viewer which parses the vis file and generates graphs that can be used to analyze and compare results.
